# Supplementary material for: A Bayesian approach to investigate life course hypotheses involving continuous exposures
Source: PubMed Central journal article supplement (PMC6208282; doi:10.1093/ije/dyy107), 2018-06-14
Supplement: dyy107_suppl_data.pdf [file dyy107_suppl_data.pdf]

## Supplementary material

### Details of hierarchical Bayesian RLM used for real data example

Let  $X_{ti}$  denote the exposure measurement of  $i^{th}$  ( $i = 1, 2, \dots, N$ ) participant at  $t^{th}$  ( $t = 1, 2, \dots, T$ ) time point. Also,  $j$  ( $j = 1, 2, \dots, J$ ) denotes the participant's age group. In addition,  $y_{ij}$  denotes the oral cancer status of the participant and  $lx_{ij}$  denotes relevant life course exposure.

#### Likelihood:

$$lx_{ij} = \sum_{t=1}^T w_{tj} * x_{ti}$$

$$\text{logit}(p_{ij}) = \beta_0 + \delta_j * lx_{ij} + \lambda * C_i$$

$$y_{ij} \sim \text{Bernoulli}(p_{ij})$$

$$\delta_j \sim \text{Normal}(\delta, \sigma)$$

$$w_{t,j} \sim \text{Dirichlet}(\alpha)$$

$$\alpha = \phi * \kappa$$

#### Priors:

$$\phi \sim \text{Dirichlet}(1,1,1)$$

$$\kappa \sim \text{Poisson}(10)T(6,)$$

$$\delta \sim \text{Cauchy}(0,2.5)$$

$$\sigma \sim \text{Normal}(0,1)$$

$$\beta_0 \sim \text{Cauchy}(0,10)$$

$$\lambda \sim \text{Cauchy}(0,2.5)$$

Parameterizing the Dirichlet distribution as expected value ( $\phi$ ) and strength of prior evidence ( $\kappa$ ) allow us to easily state prior on the average weight function. Since there is no prior study in the field on betel quid chewing, we give the weak prior ( $\text{poisson}(10), \text{Dirichlet}(1,1,1)$ ) for these hyperparameters. The codes for the above model in JAGS is available upon request from the corresponding author.

### Stan code for Bayesian Relevant life course exposure model (RStan 2.14)

```
data{
  int<lower=0> N;          #Number of observations
  int<lower=0> T;          #Time points/ life periods of measurement
  int n_cons;             #Number of co-variates

  matrix[N,T] expMat;     #Matrix of exposure measures
  matrix[N,n_cons] conMat; #Matrix of co-variates

  int<lower=0, upper=1> y[N]; #Binary outcome variable
  vector[T] Dalp;         #The parameters for dirichlet prior

  #Expected weights for critical period hypothesis
  vector[T] STC[T];

  #Reference vector of weights for accumulation period hypothesis
  vector[T] STA;
}
parameters{
  real alpha;             #Intercept
  real delta;             #Life-Time effect parameter
  vector[n_cons] lambda; #Parameters for co-variates
  simplex[T] W;          #Weights
}
transformed parameters{
  vector[N] xb;
  #Linear combination
  xb = alpha + delta*(expMat*W) + (conMat*lambda);
}
model{
  alpha ~ cauchy(0,5);    #Prior for Intercept
  delta ~ cauchy(0,2.5); #Prior for life-time effect

  for(i in 1:n_cons){
    lambda[i] ~ cauchy(0,2.5); #Priors for co-variates
  }
  W ~ dirichlet(Dalp);   #Prior for weights

  y ~ bernoulli_logit(xb); #Logistic likelihood
}
generated quantities{
  vector[T+1] EucDist;    #Euclidean Distances
  real exp_delta;        #Odds ratio of lifetime effect

  for(i in 1:T){
    EucDist[i] = distance(W, STC[i]);
  }

  EucDist[T+1] = distance(W,STA);

  exp_delta = exp(delta);
}
```

## R code for simulation

# R version 3.3.2

```
#Loading libraries
  library(MASS)
  library(boot)

  library(rstan)
  rstan_options(auto_write = TRUE)
  options(mc.cores = parallel::detectCores())

#Setting seed for random number generator
  set.seed(28278)

#Sample sizes
  N1 <- 700
  N2 <- 1500
  N3 <- 3000

#Mean & SD of variables
  mu <- c(0,0,0)
  sd <- c(1,1,1)
  sd2 <- sd %**% t(sd)

#Correlation Matrix
  rho <- 0.7
  corMat <- cbind(c(1,rho,rho^2),c(rho,1,rho),c(rho^2,rho,1))
  corMat

#Covariance Matrix
  Sigma <- sd2*corMat

#Simulating three correlated exposure variables
  X1 <- mvrnorm(N1, mu=mu, Sigma = Sigma, empirical=TRUE)
  X2 <- mvrnorm(N2, mu=mu, Sigma = Sigma, empirical=TRUE)
  X3 <- mvrnorm(N3, mu=mu, Sigma = Sigma, empirical=TRUE)

#True Parameter values
#Overall effect
  beta <- 2

#Critical Period model = 3
  WC3 <- c(0,0,1)

#Pure Accumulation model
  WA <- c(1/3,1/3,1/3)

#Sensitive period model 1st period >2nd peiod >3rd period
  WSe <- c(0.75,0.20,0.05)
```

```
#Simulating Outcomes
#Critical period outcome
y1C3 <- rbinom(N1, size=1, prob= inv.logit(beta*((X1 %**% WC3)[,1])))
y2C3 <- rbinom(N2, size=1, prob= inv.logit(beta*((X2 %**% WC3)[,1])))
y3C3 <- rbinom(N3, size=1, prob= inv.logit(beta*((X3 %**% WC3)[,1])))

#Accumulation outcome
y1A <- rbinom(N1, size=1, prob= inv.logit(beta*((X1 %**% WA)[,1])))
y2A <- rbinom(N2, size=1, prob= inv.logit(beta*((X2 %**% WA)[,1])))
y3A <- rbinom(N3, size=1, prob= inv.logit(beta*((X3 %**% WA)[,1])))

#Sensitive period outcome
y1Se <- rbinom(N1, size=1, prob= inv.logit(beta*((X1 %**% WSe)[,1])))
y2Se <- rbinom(N2, size=1, prob= inv.logit(beta*((X2 %**% WSe)[,1])))
y3Se <- rbinom(N3, size=1, prob= inv.logit(beta*((X3 %**% WSe)[,1])))

#Expected weight vectors
StC <- cbind(c(1,0,0),c(0,1,0),c(0,0,1))
StA <- WA
```

**Supplementary Table 1. Posterior median of Euclidean distance from estimated weights to reference vectors of life course models**

| Sample size | True Life course Scenario | Reference vectors for standard life course scenarios* |      |             |             |             |
|-------------|---------------------------|-------------------------------------------------------|------|-------------|-------------|-------------|
|             |                           | C1                                                    | C2   | C3          | A           | S           |
| 700         | C3                        | 1.29                                                  | 1.30 | <b>0.15</b> | 0.67        | 1.09        |
|             | A                         | 0.84                                                  | 0.85 | 0.77        | <b>0.10</b> | 0.56        |
|             | S                         | 0.31                                                  | 1.13 | 1.22        | 0.53        | <b>0.09</b> |
| 1500        | C3                        | 1.38                                                  | 1.38 | <b>0.05</b> | 0.77        | 1.18        |
|             | A                         | 0.85                                                  | 0.77 | 0.84        | <b>0.07</b> | 0.54        |
|             | S                         | 0.30                                                  | 1.12 | 1.24        | 0.54        | <b>0.06</b> |
| 3000        | C3                        | 1.36                                                  | 1.36 | <b>0.07</b> | 0.75        | 1.16        |
|             | A                         | 0.85                                                  | 0.78 | 0.82        | <b>0.06</b> | 0.55        |
|             | S                         | 0.34                                                  | 1.08 | 1.23        | 0.52        | <b>0.05</b> |

\*C1 = Critical period 1 ( $w_1=1, w_2=0, w_3=0$ ); C2 = Critical period 2 ( $w_1=0, w_2=1, w_3=0$ ); C3 = Critical period 3 ( $w_1=0, w_2=0, w_3=1$ ); A = Accumulation ( $w_1=w_2=w_3=0.333$ ), S = Sensitive period ( $w_1=0.75, w_2=0.20, w_3=0.05$ ). The lowest Euclidean distances are in bold.

**Supplementary Table 2. Posterior mean and 95% credible intervals for absolute bias of parameter estimates under different life course scenarios and sample sizes**

| Parameters             | Sample Sizes | Life course scenario (parameter values) |                            |                            |
|------------------------|--------------|-----------------------------------------|----------------------------|----------------------------|
|                        |              | Critical period                         | Accumulation               | Sensitive period           |
| <b>W1</b>              | 700          | 0.065<br>(0.004 – 0.154)                | -0.017<br>(-0.134 – 0.099) | 0.012<br>(-0.111 – 0.135)  |
|                        | 1500         | 0.021<br>(0.001 – 0.065)                | -0.021<br>(-0.105 – 0.062) | 0.017<br>(-0.068 – 0.104)  |
|                        | 3000         | 0.030<br>(0.002 – 0.075)                | -0.024<br>(-0.084 – 0.036) | -0.007<br>(-0.065 – 0.053) |
| <b>W2</b>              | 700          | 0.054<br>(0.002 – 0.153)                | -0.024<br>(-0.174 – 0.129) | -0.032<br>(-0.167 – 0.105) |
|                        | 1500         | 0.019<br>(0.001 – 0.063)                | 0.036<br>(-0.073 – 0.146)  | -0.019<br>(-0.118 – 0.076) |
|                        | 3000         | 0.025<br>(0.020 – 0.072)                | 0.029<br>(-0.20 – 0.109)   | 0.012<br>(-0.060 – 0.080)  |
| <b>W3</b>              | 700          | -0.119<br>(-0.220 – -0.032)             | 0.041<br>(-0.077 – 0.157)  | 0.019<br>(-0.046 – 0.123)  |
|                        | 1500         | -0.41<br>(-0.094 – -0.006)              | -0.014<br>(-0.100 – 0.040) | 0.002<br>(-0.047 – 0.076)  |
|                        | 3000         | -0.055<br>(-0.106 – -0.013)             | -0.005<br>(-0.066 – 0.055) | -0.005<br>(-0.047 – 0.050) |
| <b>Lifetime effect</b> | 700          | 0.145<br>(-0.169 – 0.479)               | 0.086<br>(-0.228 – 0.417)  | 0.001<br>(-0.298 – 0.319)  |
|                        | 1500         | 0.052<br>(-0.158 – 0.270)               | 0.086<br>(-0.228 – 0.417)  | 0.061<br>(-0.151 – 0.280)  |
|                        | 3000         | 0.046<br>(-0.104 – 0.202)               | -0.087<br>(-0.230 – 0.060) | 0.066<br>(-0.087 – 0.223)  |

**Supplementary Table 3. Comparing Bayesian RLM with the Structured approach using WAIC\***

| Approach                         | Model fit | Life course scenario |                           |                      |
|----------------------------------|-----------|----------------------|---------------------------|----------------------|
|                                  |           | Critical period      | WAIC (SE)<br>Accumulation | Sensitive period     |
| Structured approach              | C1        | 888.39 (17.6)        | 783.39 (23.7)             | 679.72 (27.8)        |
|                                  | C2        | 818.98 (21.4)        | 736.73 (26.2)             | 789.28 (23.3)        |
|                                  | C3        | <b>642.02 (28.4)</b> | 769.93 (25.1)             | 879.25 (18.0)        |
|                                  | A         | 737.03 (24.9)        | <b>678.84 (28.2)</b>      | 726.23 (26.4)        |
|                                  | S         | 643.80 (28.6)        | 682.22 (28.5)             | <b>672.64 (28.5)</b> |
| Bayesian Relevant exposure model |           | <b>642.15 (28.3)</b> | <b>682.19 (28.1)</b>      | <b>671.51 (28.2)</b> |

\*C1 = Critical period 1; C2 = Critical period 2; C3 = Critical period 3; A = Accumulation, S = Sensitive period. The lowest WAIC values are in bold.

**Supplementary Table 4. Mean and Standard deviation of chew-years of betel quid chewing at three life periods (<20 years, 21-40 years, >40 years) by age group and case-control status**

| Life periods          | Age groups     |                  |                 |                   |                 |                 |                   |                   |                   |                   |
|-----------------------|----------------|------------------|-----------------|-------------------|-----------------|-----------------|-------------------|-------------------|-------------------|-------------------|
|                       | Below 40 years |                  | 41 to 50 years  |                   | 51 to 60 years  |                 | 61 to 70 years    |                   | Above 70 years    |                   |
|                       | Control        | Case             | Control         | Case              | Control         | Case            | Control           | Case              | Control           | Case              |
| < 20 years of age     | 7.5<br>(10.6)  | 12.08<br>(16.8)  | 0.50<br>(0.1)   | 10.44<br>(16.3)   | 1.29<br>(2.6)   | 10.81<br>(17.0) | 1.10<br>(3.3)     | 10.37<br>(17.7)   | 10.19<br>(20.0)   | 13.32<br>(18.3)   |
| 21 to 40 years of age | 11.50<br>(4.9) | 126.27<br>(97.8) | 24.65<br>(29.3) | 119.35<br>(103.1) | 51.43<br>(60.8) | 90.31<br>(69.4) | 66.14<br>(65.7)   | 93.88<br>(79.0)   | 71.82<br>(77.6)   | 121.45<br>(117.1) |
| > 40 years of age     | NA             | NA               | 12.45<br>(2.7)  | 48.93<br>(48.6)   | 74.97<br>(52.5) | 99.80<br>(66.8) | 169.34<br>(161.3) | 175.58<br>(117.1) | 169.77<br>(176.8) | 283.65<br>(160.4) |

**Supplementary Table 5. Mean and 95% credible interval for life period specific weights for chew-years of Betel quid chewing for different age-groups**

| Life periods          | Age groups        |                   |                   |                   |                   |
|-----------------------|-------------------|-------------------|-------------------|-------------------|-------------------|
|                       | Below 40 years    | 41 to 50 years    | 51 to 60 years    | 61 to 70 years    | Above 70 years    |
| < 20 years of age     | 61.7 (7.3 – 90.9) | 53.4 (5.7 – 83.7) | 55.1 (5.8 – 85.6) | 56.5 (6.0 – 87.8) | 53.8 (5.9 – 82.9) |
| 21 to 40 years of age | 38.3 (9.1 – 92.7) | 31.5 (6.9 – 72.8) | 29.8 (5.9 – 72.4) | 30.5 (6.7 – 72.4) | 31.1 (6.8 – 73.2) |
| > 40 years of age     | NA                | 15.1 (2.2 – 37.5) | 15.1 (2.6 – 37.7) | 12.9 (2.2 – 34.7) | 15.2 (2.8 – 37.5) |



**Supplementary Table 6. Distribution of selected characteristics of HeNCe Life Study - India**

|                                      | Control (n=350) |              | Case (n=371) |              |
|--------------------------------------|-----------------|--------------|--------------|--------------|
|                                      | n (%)           | Mean ± SD    | n (%)        | Mean ± SD    |
| <b>Age</b>                           |                 | 60 ± 11      |              | 60 ± 11      |
| <b>Sex</b>                           |                 |              |              |              |
| Female                               | 167 (0.45)      |              | 154 (0.44)   |              |
| Male                                 | 204 (0.55)      |              | 196 (0.56)   |              |
| <b>Education</b>                     |                 |              |              |              |
| Low                                  | 182 (0.49)      |              | 267 (0.76)   |              |
| High                                 | 189 (0.51)      |              | 83 (0.24)    |              |
| <b>Material deprivation index</b>    |                 | 20.44 ± 7.1  |              | 13.80 ± 6.4  |
| <b>Pack-years of tobacco smoking</b> |                 | 12.18 ± 26.3 |              | 16.05 ± 28.2 |
| <b>Liter of ethanol consumed</b>     |                 | 0.18 ± 1.1   |              | 0.76 ± 3.0   |
| <b>Betel quid</b>                    |                 |              |              |              |
| Never                                | 306 (0.82)      |              | 97 (0.28)    |              |
| Ever                                 | 65 (0.18)       |              | 253 (0.72)   |              |

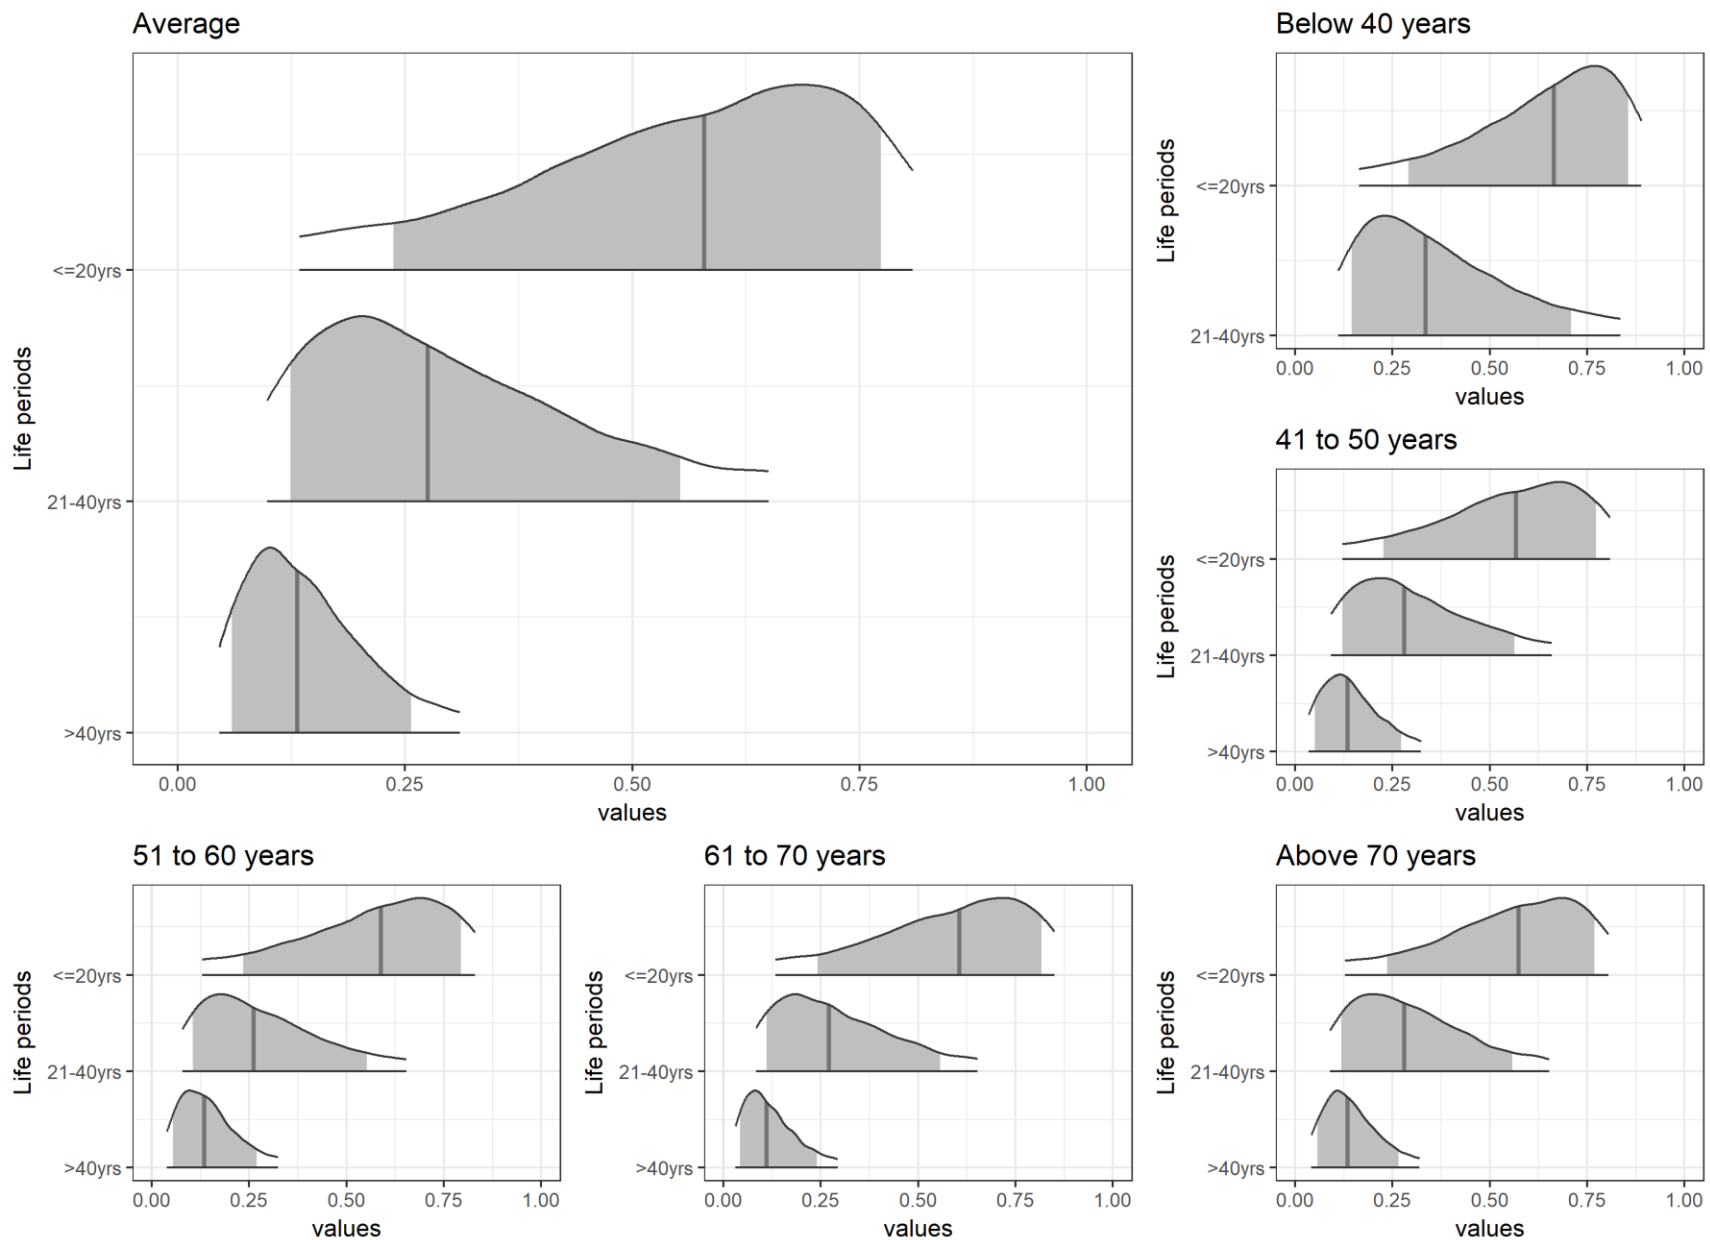

**Supplementary Figure 1. Posterior densities of life period specific weights for chew-years of betel quid chewing for different age groups and average over groups**

**Supplementary Table 7. Life time effect of betel quid chewing on risk of development of head and neck cancer among ever users**

|                    | OR (95% Credible intervals) |
|--------------------|-----------------------------|
| Average            | 1.04 (1.00 – 1.15)          |
| Age-group specific |                             |
| Below 40 years     | 1.04 (0.99 – 1.16)          |
| 41 to 50 years     | 1.07 (1.01 – 1.26)          |
| 51 to 60 years     | 1.05 (1.01 – 1.14)          |
| 61 to 70 years     | 1.04 (1.01 – 1.14)          |
| Above 70 years     | 1.02 (1.00 – 1.04)          |

## SAS code for Bayesian RLM

```
/*Bayesian Relevant Life Course Exposure model*/
/*Three life periods example*/
/*Binary outcome with logistic likelihood and no confounders*/

/*Using Marginal priors on weights*/

proc mcmc data=Data nbi=50000 nmc=100000 outpost=OutData
          init = random monitor=(lw1 lw2 lw3 beta0 delta w);

  parms lw1 lw2 lw3 ;
  array w[3];
  w[1] = exp(lw1)/(exp(lw1)+ exp(lw2)+ exp(lw3));
  w[2] = exp(lw2)/(exp(lw1)+ exp(lw2)+ exp(lw3));
  w[3] = exp(lw3)/(exp(lw1)+ exp(lw2)+ exp(lw3));

  parms beta0 delta ;
  prior beta0 ~ cauchy(0,2.5);
  prior delta ~ cauchy(0,2.5);

  prior lw1 ~ beta(1,1);
  prior lw2 ~ beta(1,1);
  prior lw3 ~ beta(1,1);

  p = logistic(beta0+ delta*(w[1]*x1+w[2]*x2+w[3]*x3));
  model y ~ binomial(1,p);
run;

/*Using Joint multivariate prior on weights*/

proc mcmc data=Data nbi=50000 nmc=100000 outpost=DataOut
          init=random diag=(mcse ess) propcov=quanew;

  array dal[3];
  begincnst;
    do i =1 to 3;
      dal[i] = 1;
    end;
  endcnst;

  array w[3];
  parms w;
  parms beta0 delta;

  prior beta0 ~ cauchy(0,2.5);
  prior delta ~ cauchy(0,2.5);
  prior w~dirichlet(alpha=dal);

  p = logistic(beta0+ delta*(w1*x1+w2*x2+w3*x3));
  model y ~ binomial(1,p);
run;
```
